# Supplementary material for: Colloidal CdS and CdZnS nanocrystal photocatalysts with massive S2−-adsorption: one-step facile synthesis and highly efficient H2-evolution performance
Source: Royal Society of Chemistry journal article supplement (doi:10.1039/d0cc01191f), 2020-01-01
Supplement: d0cc01191f1.pdf [file d0cc01191f1.pdf]

## Electronic Supplementary Information

### **Colloidal CdS and CdZnS nanocrystal photocatalysts with massive S<sup>2-</sup>-adsorption: one-step facile synthesis and highly efficient H<sub>2</sub>-evolution performance**

Wei Zhong,<sup>a</sup> Ying Huang,<sup>b</sup> Xuefei Wang,<sup>b</sup> Jiajie Fan<sup>c</sup> and Huogen Yu<sup>\*ab</sup>

<sup>a</sup> State Key Laboratory of Silicate Materials for Architectures, Wuhan University of Technology, Wuhan 430070, PR China

<sup>b</sup> Department of Chemistry, School of Chemistry, Chemical Engineering and Life Sciences, Wuhan University of Technology, Wuhan 430070, PR China

<sup>c</sup> School of Materials Science and Engineering, Zhengzhou University, Zhengzhou 450002, PR China

Tel: 0086-27-87756662, Fax: 0086-27-87879468

E-mail: yuhuogen@whut.edu.cn (H.Yu)

## **Part I: Experimental details**

### **1.1 Synthesis and photocatalytic H<sub>2</sub>-generation tests of colloidal CdS-NCs**

The colloidal CdS-NC photocatalyst was synthesized via a facile precipitation method in a sulfur-rich system (a 0.35 M Na<sub>2</sub>S/ 0.25 M Na<sub>2</sub>SO<sub>3</sub> mixing solution). Typically, 1.15 mL of Cd(NO<sub>3</sub>)<sub>2</sub> solution was quickly added into 80 mL of mixing solution with 0.35 mol/L Na<sub>2</sub>S and 0.25 mol/L Na<sub>2</sub>SO<sub>3</sub> under vigorously stirring. After maintain for another 60 min, a yellow solution was obtained. In this case, the ratio of Cd<sup>2+</sup> to S<sup>2-</sup> was designed to be ca. 1:810, and the amount of CdS-NC photocatalyst was controlled to be 5 mg. To characterize the morphology and microstructures via FESEM and TEM, the CdS-NCs were collected by centrifugation, washed with distilled water several times, and finally dispersed in ethanol by ultrasound. For the CdS-NC powder, the above colloidal CdS-NC solution was centrifuged and washed with distilled water several times and then dried at 60 °C for 12 h. For the photocatalytic H<sub>2</sub>-evolution test of colloidal CdS-NCs, the above colloidal CdS-NC solution was directly used for the following H<sub>2</sub>-evolution reaction after purged with N<sub>2</sub> for 15 min. A 350-W Xe lamp with a UV cutoff filter ( $\lambda \geq 420$  nm) was used as the light source, and the amount of evolved H<sub>2</sub> was tested using a Shimadzu gas chromatograph (a thermal conductivity detector and a 5 Å molecular sieve column, Shimadzu GC-2014C, Japan).

### **1.2 Synthesis and photocatalytic H<sub>2</sub>-evolution experiments of *c*-CdS and *h*-CdS**

The *h*-CdS photocatalyst was synthesized via a typical precipitation-calcination rout. Briefly, a Na<sub>2</sub>S solution (0.1 mol L<sup>-1</sup>, 250 mL) was added into Cd(NO<sub>3</sub>)<sub>2</sub> solution (0.1 mol L<sup>-1</sup>, 250 mL) under stirring, and finally orange precipitates were obtained. After stirring for another 4 h, the suspension was aging for 24 h. The precipitate was filtered, washed with water and ethanol several times, followed by dried at 60 °C for 24 h. After grinded into powder, the obtained orange product was labeled as *c*-CdS. Next, the above *c*-CdS was calcined at 550 °C for 4 h under N<sub>2</sub> atmosphere to prepare traditional hexagonal CdS (*h*-CdS). As for the photocatalytic H<sub>2</sub>-generation tests of *c*-CdS and *h*-CdS, their corresponding power (50 mg) was dispersed in the sulfur-rich solution (80 mL, 0.25 M Na<sub>2</sub>SO<sub>3</sub> and 0.35 M Na<sub>2</sub>S), and the following process is similar to that of colloidal CdS-NCs. The as-obtained *c*-CdS and *h*-CdS powder were used for its corresponding characterization.

### **1.3 Synthesis and photocatalytic H<sub>2</sub>-production experiments of colloidal CdZnS-NCs**

The colloidal CdZnS-NCs were prepared by a one-step co-precipitation strategy in a sulfur-rich system, similar to the above synthesis of colloidal CdS-NCs. In a typical synthesis, 114.7 μL of 0.044 mol L<sup>-1</sup> Zn(NO<sub>3</sub>)<sub>2</sub> solution was added into 116.2 μL of 0.03 mol L<sup>-1</sup> Cd(NO<sub>3</sub>)<sub>2</sub> solution to form a Zn/Cd mixing solution. Then, the above Zn/Cd mixing solution was directly poured into 80 mL of the sulfur-rich system under vigorously stirring. After stirred for 60 min, a colloidal Cd<sub>0.4</sub>Zn<sub>0.6</sub>S-NC solution containing 1 mg photocatalyst was obtained. Additionally, various colloidal Cd<sub>x</sub>Zn<sub>1-x</sub>S-NCs (x = 1, 0.8, 0.6, 0.4, 0.2, 0) were also prepared by changing the volume ratio

of  $\text{Cd}(\text{NO}_3)_2$  to  $\text{Zn}(\text{NO}_3)_2$  solution with aim of investigating the relation between the bandgap structure and photocatalytic  $\text{H}_2$ -evolution activity. As for the characterization and photocatalytic  $\text{H}_2$ -evolution test of colloidal  $\text{CdZnS}$ -NCs, the process is similar to the colloidal  $\text{CdS}$ -NCs, and the detailed experiments can be referred in **1.1 Synthesis and photocatalytic  $\text{H}_2$ -generation tests of colloidal  $\text{CdS}$ -NCs.**

#### **1.4 Characterization**

X-ray diffraction (XRD) data was obtained by a Rigaku III X-ray diffractometer. The morphology and structure of various samples was recorded by a JSM-7500F field emission scanning electron microscope (FESEM) and JEM-2100F transmission electron microscope (TEM) acquired with an energy dispersive X-ray spectrometer (EDS mapping). Nexus FTIR Spectrophotometer and INVIA spectrophotometer were applied to detect FTIR and Raman spectra, respectively. To obtain UV-Vis absorption spectra, a UV-2450 spectrophotometer was employed. The XPS data was carried out with a KRATOA XSAM800 system. The Zeta potentials were determined using a Malvern Zetasizer ZEN 3600 analyzer (Malvern Instruments Ltd., Malvern, U.K.). The XPS valence-band spectra measurements were carried out on a ThermoFisher EscaLab 250Xi at a  $01^\circ$  angle of emission using a monochromatic Al K $\alpha$  source ( $E_{\text{photon}} = 1486.6 \text{ eV}$ ) with a 10 mA filament current and a 14.7 keV filament voltage source energy. The above measurements were carried out in a field of 0.5 mm and a pass energy of 30 eV. In order to compensate for the charging of the sample, a charge neutralizer was used.

#### **1.5 Photoelectrochemical Measurements**

The photoelectrochemical tests, including transient photocurrent responses ( $J$ - $t$  curve) and electrochemical impedance spectroscopy (EIS), were performed on a CHI660E workstation during a nitrogen atmosphere using the sulfur-rich solution. The photocatalyst-coated FTO, Ag/AgCl and Pt wire works as the working, reference and counter electrode, respectively. The working electrode was prepared as follows: photocatalyst powder (20 mg) was dispersed into 2 mL of absolute alcohol, and then, 2 mL of 1 wt % Nafion ethanol mixing solution was added. After ultrasonicated for 10 min, the above suspension was coated on the FTO surface (the effective area was controlled to 1 cm<sup>2</sup>) to obtain the photocatalyst-coated FTO electrode. During  $J$ - $t$  curve measurements, a 420 nm LED (3 W) was used as the light source, and the open-circuit voltage was used as the applied bias. For the EIS measurements, the frequency was applied from 0.001 to 106 Hz with an amplitude of 0.01 V.

## 1.6 Measurement of apparent quantum efficiency

The apparent quantum efficiency (AQE) of the prepared photocatalysts is calculated via the following equation:

$$AQE(\%) = \frac{\text{number of reacted electrons}}{\text{number of incident photons}} \times 100\% \\ = \frac{\text{number of evolved H}_2 \text{ molecules} \times 2}{\text{number of incident photons}} \times 100\%$$

In this work, the measured power of the 350-W Xe lamp with a UV cutoff filter ( $\lambda \geq 420$  nm) and the average power of the LED light (four 3-W 365 nm) was 120, 24.3 mW/cm<sup>2</sup>, respectively. Hence, the AQE of the colloidal CdS-NCs and the colloidal Cd<sub>0.4</sub>Zn<sub>0.6</sub>S-NCs can be calculated to be 52.8, 66.4%, respectively.

### 1.7 Calculation of the bandgap structure of the colloidal CdZnS-NCs

To get a deeper insight for bandgap structure of the colloidal CdZnS nanocrystals, the position of valence band (VB) and conduction band (CB) are calculated using the following equations, which is similar to the previous works [1, 2, 3].  $\text{Cd}_x\text{Zn}_y\text{S}_z$  was taken as an example for the following equations:

$$E_{VB} = X - E^e + 1/2E_g$$

$$E_{CB} = X - E^e - 1/2E_g$$

$$X = \{X_{\text{Zn}}^x \times X_{\text{Cd}}^y \times X_{\text{S}}^z\}^{1/(x+y+z)}$$

where  $X$  is the absolute electronegativity of CdZnS and  $E^e$  is a constant as 4.5 eV. As for  $X_{\text{Zn}}$ ,  $X_{\text{Cd}}$  and  $X_{\text{S}}$ , they are the electronegativities of Zn, Cd and S elements, respectively. Based on the above equations and the obtained  $E_g$  values from UV-vis spectra, the conduction band position and valence band position of various colloidal CdZnS nanocrystals could be calculated, and the results were shown in Fig. 4E.

## Part II: Supplementary Results

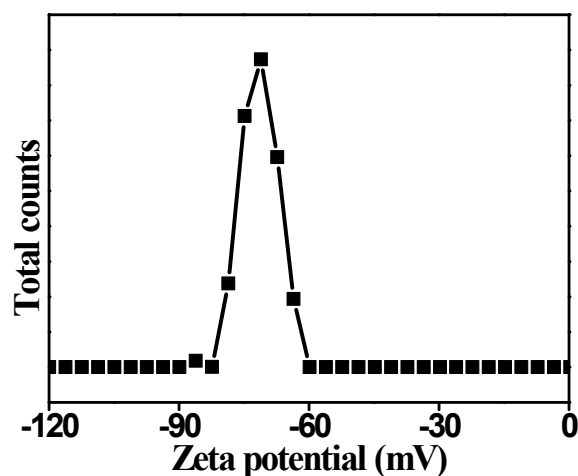

**Fig. S1** Zeta potential of the colloidal CdS-NCs solution. The average value of the Zeta potential for the colloidal CdS-NCs solution was measured as -73.5 mV.

Obviously, the colloidal CdS nanocrystals display a very negative potential (-73.5 mV), suggesting its good water solubility, dispersibility, and stability, which can be ascribed to the massive  $S^{2-}$  adsorption on the colloidal CdS nanocrystal surface. Usually, the larger the absolute value of Zeta potential, the better the stability of the nanocrystals in water. Therefore, the above results further suggest that the as-synthesized colloidal CdS nanocrystals show an excellent solubility in the sulfur-rich system due to the massive  $S^{2-}$  adsorption on its surface. The formation mechanism of the colloidal CdS nanocrystals with massive  $S^{2-}$ -adsorption can be described as the following equations:

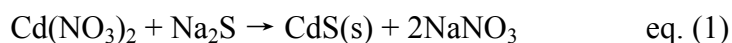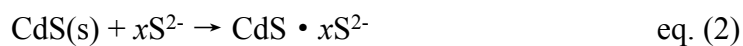

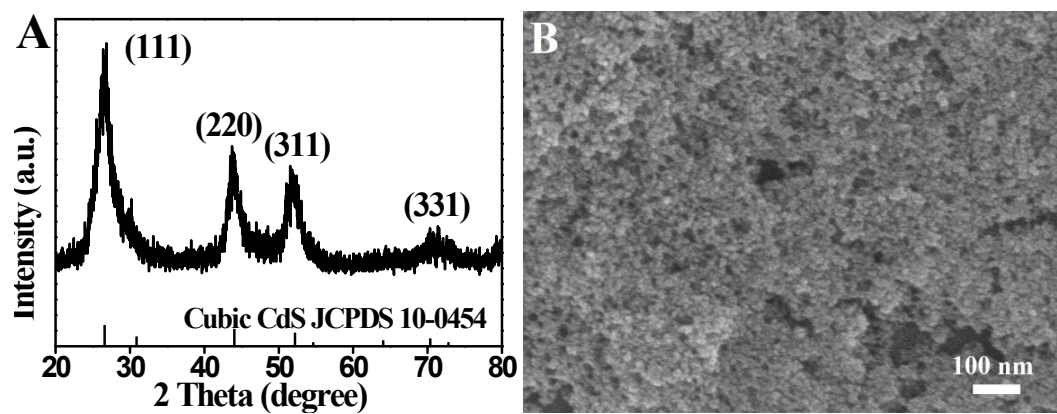

**Fig. S2** (A) Powder XRD pattern and (B) SEM image of the colloidal CdS-NCs.



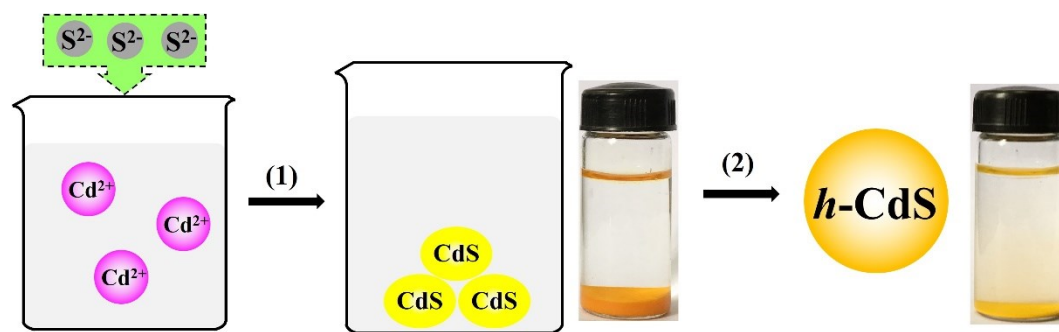

**Fig. S3** Traditional precipitation-calcination preparation of hexagonal CdS: step (1) is the formation of cubic CdS precipitation ( $c\text{-CdS}$ ); step (2) is the phase transformation to form traditional hexagonal CdS at 550 °C ( $h\text{-CdS}$ ).

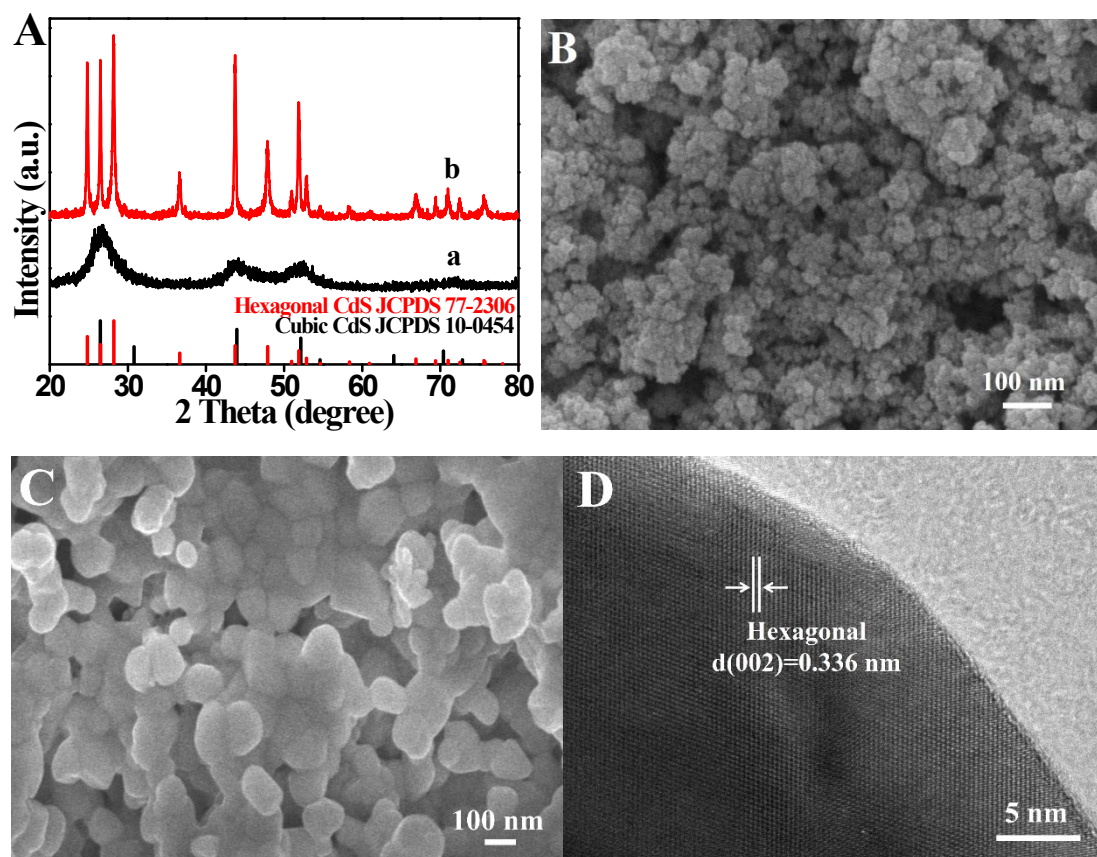

**Fig. S4** (A) Powder XRD patterns of (a) *c*-CdS and (b) *h*-CdS. (B, C) FESEM images of (B) *c*-CdS and (C) *h*-CdS. (D) Typical HRTEM image for the *h*-CdS.

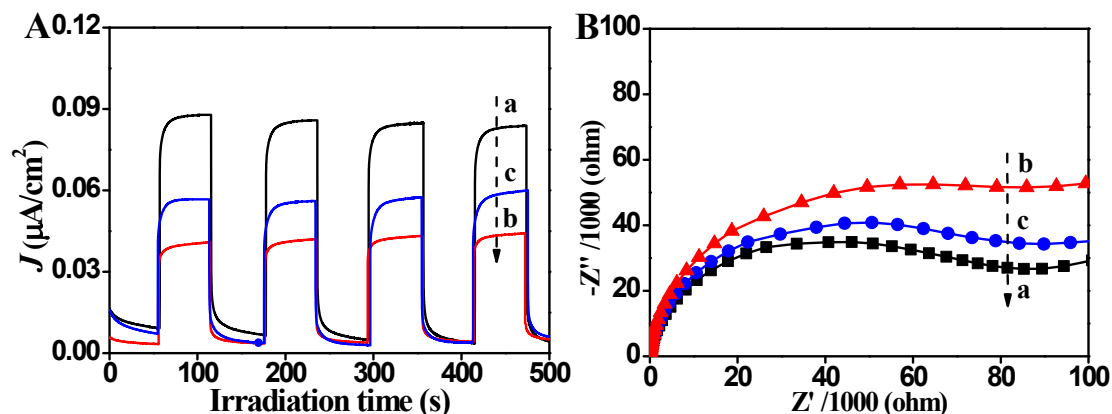

**Fig. S5** (A) Transient photocurrent responses ( $J$ - $t$  curve) and (B) electrochemical impedance spectroscopy (EIS) of (a) colloidal CdS-NCs, (b) conventional  $c$ -CdS and (c) conventional  $h$ -CdS.

As displayed in Fig. S5A, the colloidal CdS-NCs (Fig. S5A-a) exhibit an increased photocurrent density compared with the conventional  $c$ -CdS (Fig. S5A-b) and  $h$ -CdS (Fig. S5A-c) sample, indicating that the photogenerated holes in the colloidal CdS-NCs electrode can be more effectively captured by the  $\text{S}^{2-}$  than that of the conventional  $c$ -CdS and  $h$ -CdS sample, causing a rapider interfacial catalytic reaction. Moreover, the colloidal CdS-NCs sample (Fig. S5B-a) shows a smaller arc radius in the EIS plot than the traditional  $c$ -CdS (Fig. S5B-b) and  $h$ -CdS (Fig. S5B-c), revealing a higher transfer efficiency of photogenerated carriers in the colloidal CdS-NCs photocatalyst. Obviously, the above results are in good agreement with their corresponding photocatalytic  $\text{H}_2$ -evolution performance, and further support the proposed  $\text{S}^{2-}$ -mediated mechanism for the colloidal CdS-NCs photocatalyst.

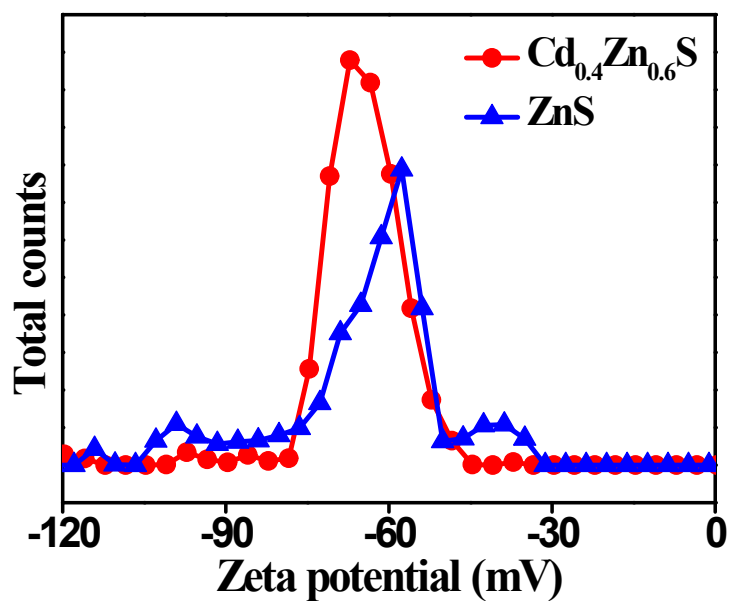

**Fig. S6** Zeta potential of the colloidal  $\text{Cd}_{0.4}\text{Zn}_{0.6}\text{S}$ -NCs and  $\text{ZnS}$ -NCs solution.

The average value of the Zeta potential for the colloidal  $\text{Cd}_{0.4}\text{Zn}_{0.6}\text{S}$ -NCs and  $\text{ZnS}$ -NCs solution was measured as -69.1 and -61.7 mV, respectively, which is mainly attributed to the massive adsorption of  $\text{S}^{2-}$  and  $\text{SO}_3^{2-}$ . In this case, the massive adsorption of  $\text{S}^{2-}$  and  $\text{SO}_3^{2-}$  on the  $\text{Cd}_{0.4}\text{Zn}_{0.6}\text{S}$ -NCs and  $\text{ZnS}$ -NCs can contribute to the excellent stability of colloidal nanocrystals.

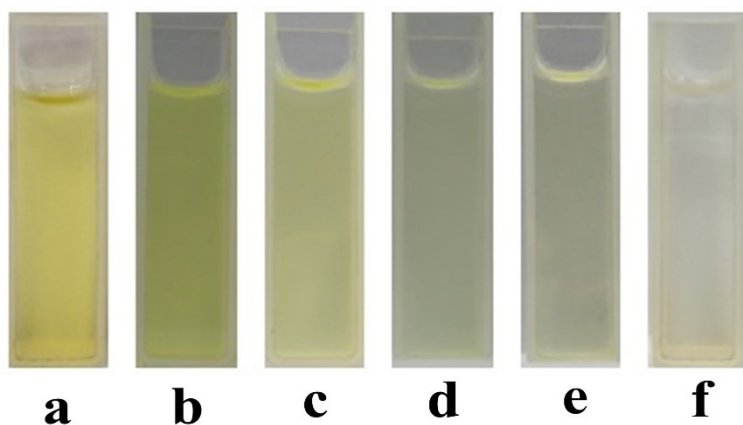

**Fig. S7** The optical pictures for the colloidal CdZnS-NC solution: (a) CdS-NCs, (b)  $\text{Cd}_{0.8}\text{Zn}_{0.2}\text{S-NCs}$ , (c)  $\text{Cd}_{0.6}\text{Zn}_{0.4}\text{S-NCs}$ , (d)  $\text{Cd}_{0.4}\text{Zn}_{0.6}\text{S-NCs}$ , (e)  $\text{Cd}_{0.2}\text{Zn}_{0.8}\text{S-NCs}$  and (f) ZnS-NCs.

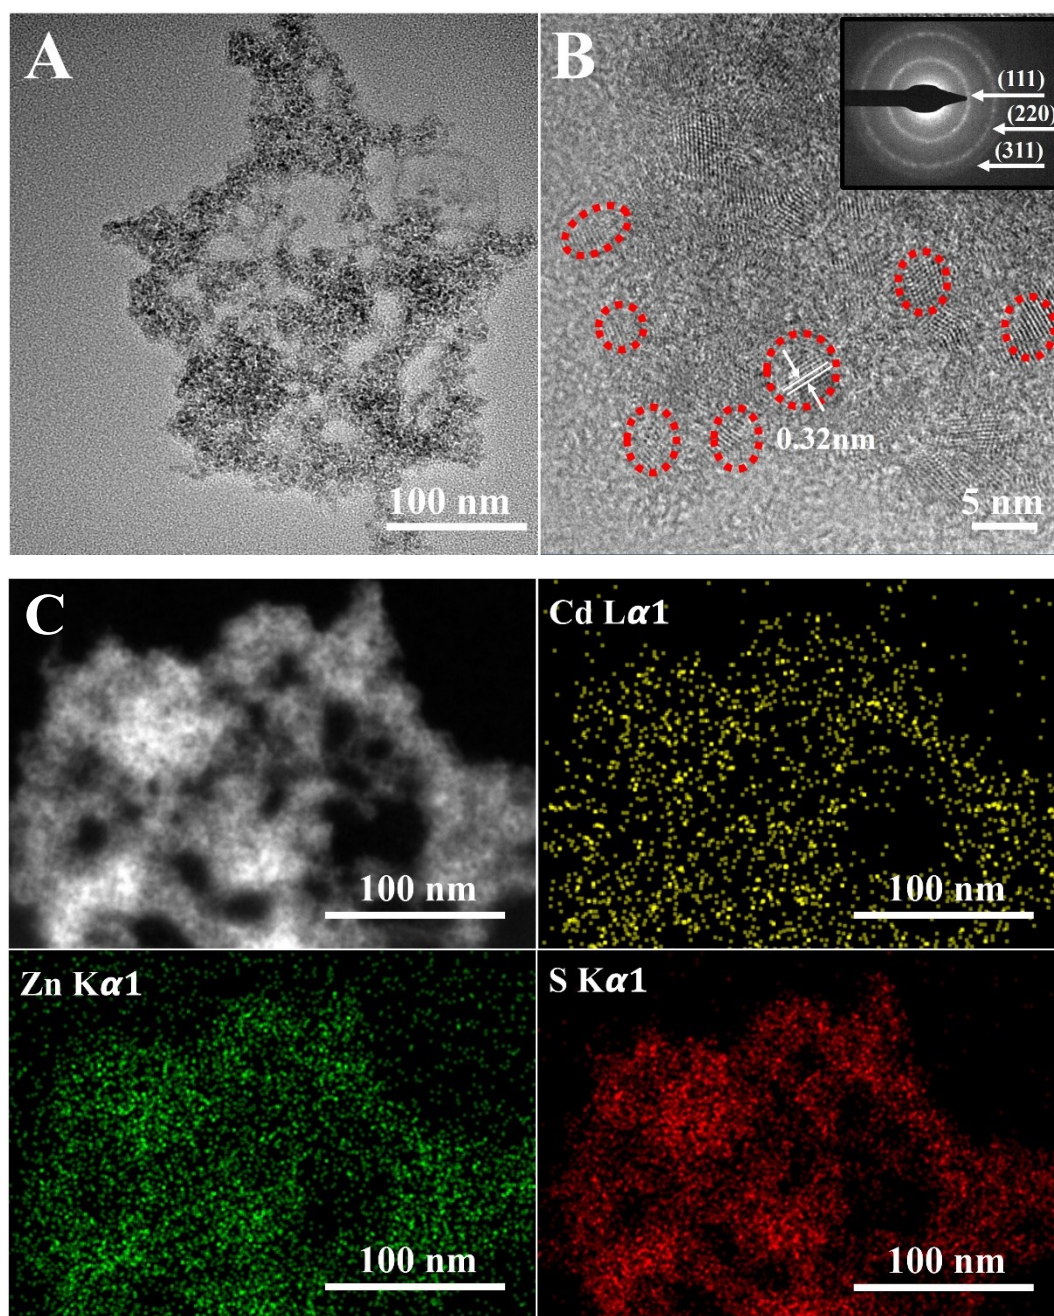

**Fig. S8** (A, B) Typical HRTEM images (SAED patterns) and (C) EDS mapping of the colloidal  $\text{Cd}_{0.4}\text{Zn}_{0.6}\text{S}$ -NCs.



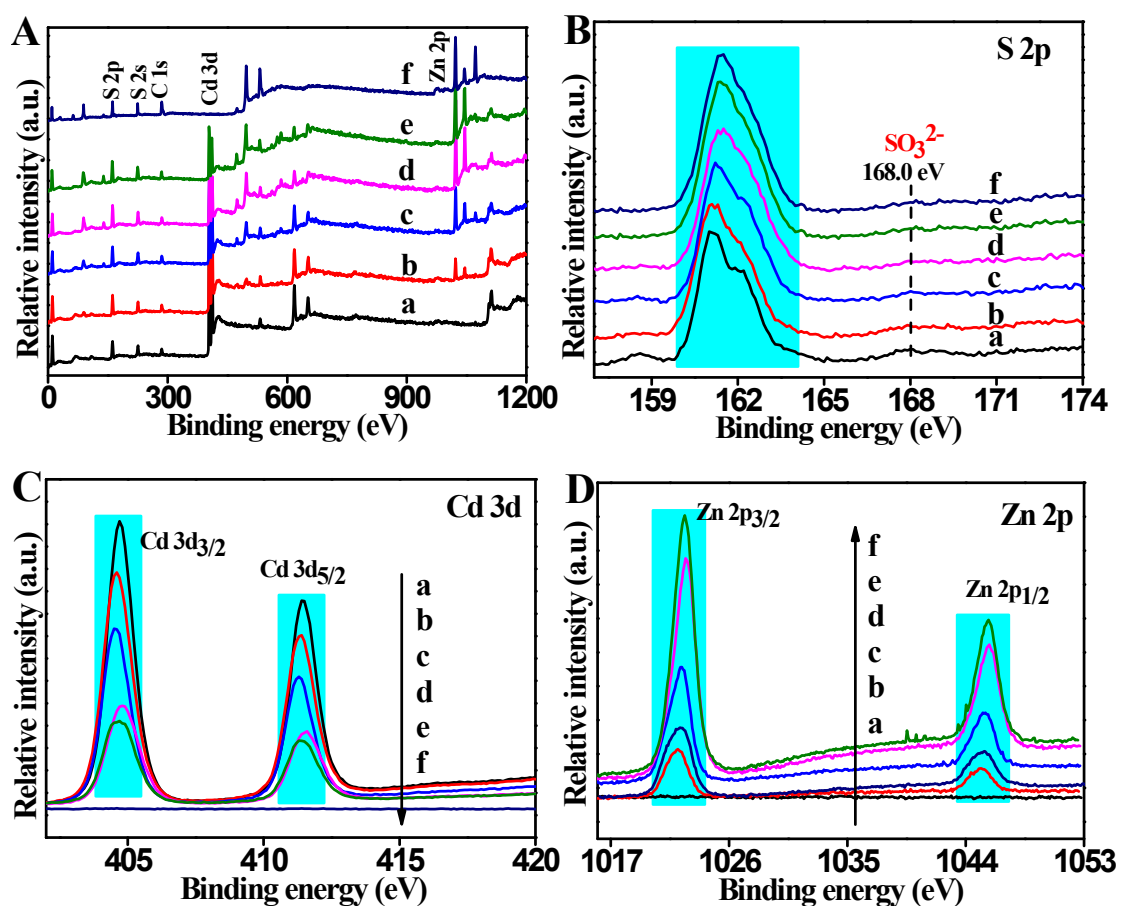

**Fig. S9** (A) XPS survey spectra and high-resolution XPS spectra of (B) S 2p, (C) Cd 3d, and (D) Zn 2p for the colloidal CdZnS-NCs: (a) CdS-NCs, (b) Cd<sub>0.8</sub>Zn<sub>0.2</sub>S-NCs, (c) Cd<sub>0.6</sub>Zn<sub>0.4</sub>S-NCs, (d) Cd<sub>0.4</sub>Zn<sub>0.6</sub>S-NCs, (e) Cd<sub>0.2</sub>Zn<sub>0.8</sub>S-NCs and (f) ZnS-NCs.

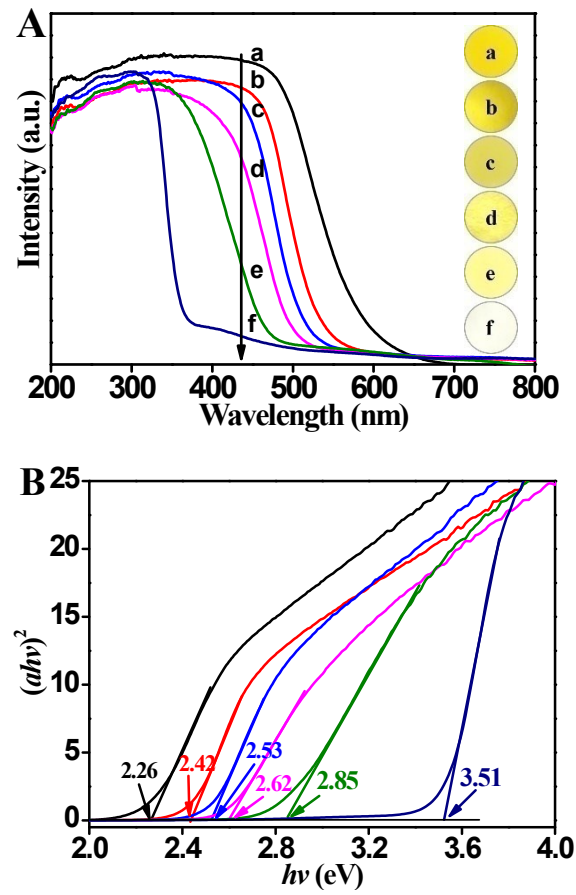

**Fig. S10** (A) UV-Vis absorption spectra and (B) band-gap evaluation from the plots for the colloidal CdZnS-NCs: (a) CdS-NCs, (b)  $\text{Cd}_{0.8}\text{Zn}_{0.2}\text{S-NCs}$ , (c)  $\text{Cd}_{0.6}\text{Zn}_{0.4}\text{S-NCs}$ , (d)  $\text{Cd}_{0.4}\text{Zn}_{0.6}\text{S-NCs}$ , (e)  $\text{Cd}_{0.2}\text{Zn}_{0.8}\text{S-NCs}$  and (f) ZnS-NCs.



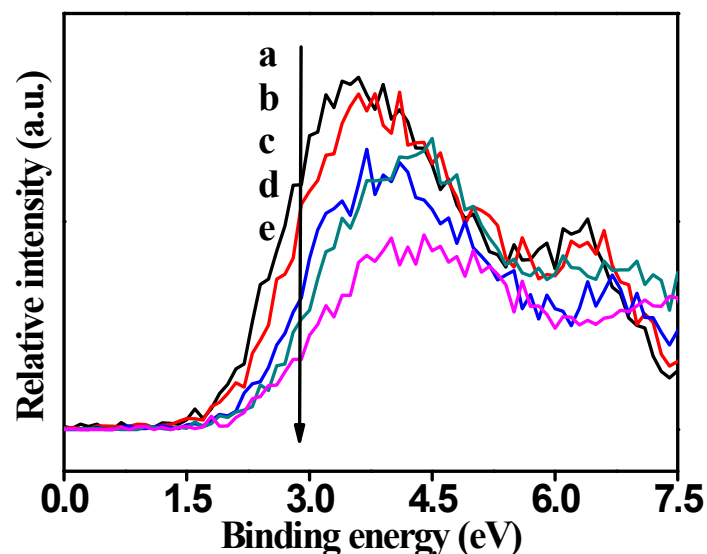

**Fig. S11** The XPS valence-band spectra for the colloidal CdZnS-NCs: (a) CdS-NCs, (b) Cd<sub>0.8</sub>Zn<sub>0.2</sub>S-NCs, (c) Cd<sub>0.4</sub>Zn<sub>0.6</sub>S-NCs, (d) Cd<sub>0.2</sub>Zn<sub>0.8</sub>S-NCs and (e) ZnS-NCs.

The XPS valence band spectra of the samples have been performed to further investigate the tunable bandgap for the prepared colloidal CdZnS-NCs. As provided in Fig. S11, the colloidal CdS-NCs exhibit a valence-band position at ca. 1.69 eV, while the colloidal ZnS-NCs possess a more positive valence-band value of ca. 2.33 eV. With increasing Zn content in colloidal CdZnS-NCs, the valence-band position of the colloidal CdZnS-NCs displays a gradual shift from 1.69 to 2.33 eV, strongly demonstrating a controllable bandgap structure of the colloidal CdZnS-NCs. Therefore, the colloidal CdZnS-NCs with a controllable bandgap structure can be easily synthesized via the present facile synthesis method.

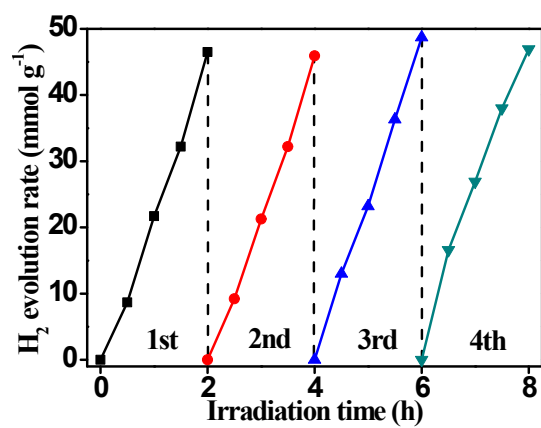

**Fig. S12** Cycling runs for the photocatalytic H<sub>2</sub> generation of the colloidal Cd<sub>0.4</sub>Zn<sub>0.6</sub>S-NC photocatalysts.

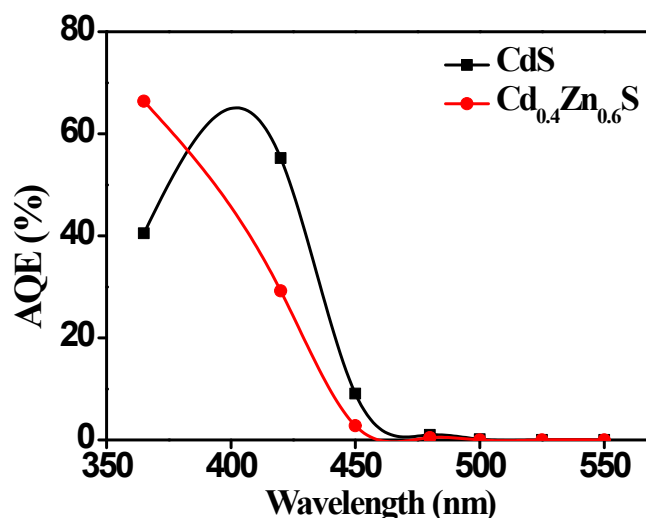

**Fig. S13** The wavelength dependent AQE values of the synthesized colloidal CdS-NCs and Cd<sub>0.4</sub>Zn<sub>0.6</sub>S-NCs photocatalysts.

As displayed in Fig. S13, the colloidal CdS-NCs show extremely low AQE value in the wavelength range over 480 nm, while the colloidal Cd<sub>0.4</sub>Zn<sub>0.6</sub>S-NCs exhibit an ignorable photocatalytic activity over 460 nm. Clearly, the trends in the wavelength-dependent AQE of the synthesized colloidal CdS-NCs and Cd<sub>0.4</sub>Zn<sub>0.6</sub>S-NCs closely followed those of the absorbance measured by UV-vis spectra. As demonstrated in Fig. S10, there is a gradual blue shift of the absorption edges by introducing and increasing Zn content in the colloidal CdS-NCs, resulting in a decreased light-absorption property of the colloidal Cd<sub>0.4</sub>Zn<sub>0.6</sub>S-NCs in visible-light region. Therefore, in comparison with the colloidal CdS-NCs, the decreased photocatalytic activity of the colloidal Cd<sub>0.4</sub>Zn<sub>0.6</sub>S-NCs in the visible-light region can be ascribed to its weakened visible-light-absorption ability.

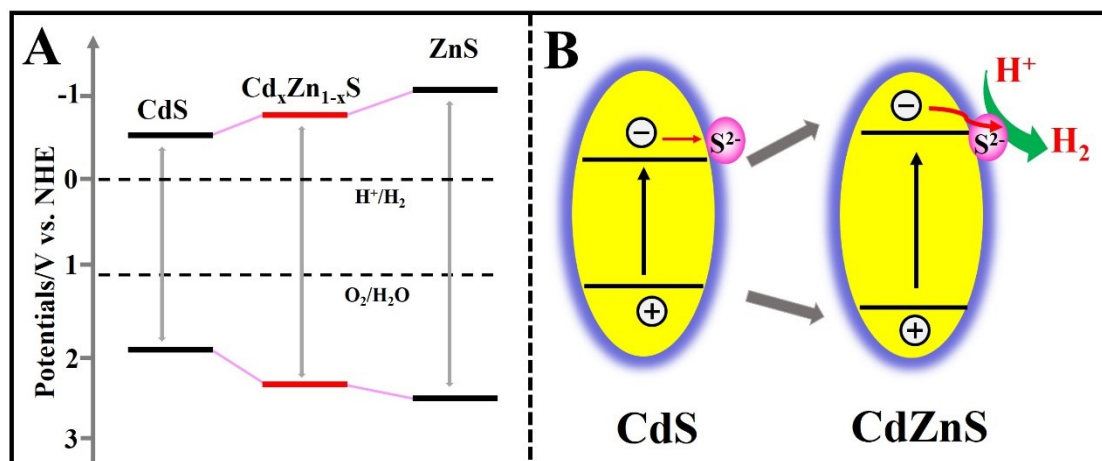

**Fig. S14** (A) The band structures of the colloidal CdZnS-NCs and (B) the comparison of the photocatalytic mechanism of the colloidal CdS-NC and the colloidal CdZnS-NC photocatalysts.

**Table S1** Comparison of the photocatalytic H<sub>2</sub>-evolution rates for typical cocatalyst-modified CdS photocatalysts.

| Photocatalyst                       | Light source        | Sacrificial agent                              | Cocatalyst           | Activity<br>[mmol·h <sup>-1</sup> g <sup>-1</sup> ] | AQE<br>[%]  | Ref.             |
|-------------------------------------|---------------------|------------------------------------------------|----------------------|-----------------------------------------------------|-------------|------------------|
| Colloidal CdS-NCs                   | 350 W Xe (> 420 nm) | S <sup>2-</sup> /SO <sub>3</sub> <sup>2-</sup> | None                 | <b>6.86</b>                                         | <b>52.8</b> | <b>This work</b> |
| CdS/Au-SCN                          | 350 W Xe (> 420 nm) | S <sup>2-</sup> /SO <sub>3</sub> <sup>2-</sup> | Au, SCN <sup>-</sup> | 2.19                                                | 11.25       | [1]              |
| CdS/GNR                             | 300 W Xe (> 420 nm) | Lactic acid                                    | GNRs                 | 1.89                                                | 19.3        | [2]              |
| Cd/CdS                              | 300 W Xe (> 420 nm) | S <sup>2-</sup> /SO <sub>3</sub> <sup>2-</sup> | Cd                   | 0.77                                                | 0.82        | [3]              |
| CdS/GQDs                            | 300 W Xe (> 420 nm) | S <sup>2-</sup> /SO <sub>3</sub> <sup>2-</sup> | GQDs                 | 2.39                                                | 4.2         | [4]              |
| CdS/Au-Co                           | 350 W Xe (> 420 nm) | Lactic acid                                    | Au, Co <sup>2+</sup> | 1.73                                                | -           | [5]              |
| MoS <sub>2</sub> /CdS               | 300 W Xe (> 420 nm) | Lactic acid                                    | MoS <sub>2</sub>     | 3.14                                                | 3.66        | [6]              |
| CoP/CdS/rGO                         | 300 W Xe (> 420 nm) | Lactic acid                                    | CoP, rGO             | 1.10                                                | -           | [7]              |
| CdS/g-C <sub>3</sub> N <sub>4</sub> | 300 W Xe (> 420 nm) | Lactic acid                                    | Pt                   | 2.54                                                | -           | [8]              |
| NiS/CdS                             | 300 W Xe (> 420 nm) | Lignin, Lactic acid                            | NiS                  | 1.51                                                | 44.9        | [9]              |
| CdS/WS <sub>2</sub> /GO             | 500 W Xe (> 420 nm) | S <sup>2-</sup> /SO <sub>3</sub> <sup>2-</sup> | WS <sub>2</sub> , GO | 1.84                                                | 21.2        | [10]             |

## References

- [1] P. Wang, Y. Sheng, F. Wang and H. Yu, *Appl. Catal., B*, 2018, **220**, 561-569.
- [2] Y. Xia, B. Cheng, J. Fan, J. Yu and G. Liu, *Small*, 2019, **15**, 1902459.

- [3] W. Zhong, S. Shen, M. He, D. Wang, Z. Wang, Z. Lin, W. Tu and J. Yu, *Appl. Catal., B*, 2019, **258**, 117967.
- [4] Y. Lei, C. Yang, J. Hou, F. Wang, S. Min, X. Ma, Z. Jin, J. Xu, G. Lu and K. Huang, *Appl. Catal., B*, 2017, **216**, 59-69.
- [5] X. Yi, H. Li, P. Wang, J. Fan and H. Yu, *Appl. Surf. Sci.*, 2019, **473**, 144786.
- [6] Z. Zhang, Q. Li, X. Qiao, D. Hou and D. Li, *Chin. J. Catal.*, 2019, **40**, 371-379.
- [7] H. An, X. Yan, H. Li, B. Yang, J. Wei and G. Yang, *ACS Appl. Energy Mater.*, 2019, **2**, 4195-4204.
- [8] L. Chen, Y. Xu and B. Chen, *Appl. Catal., B*, 2019, **256**, 117848.
- [9] C. Li, H. Wang, S. Naghadeh, J. Zhang and P. Fang, *Appl. Catal., B*, 2018, **227**, 229-239.
- [10] Q. Xiang, F. Cheng and D. Lang, *ChemSusChem*, 2016, **9**, 996-1002.
